# Supplementary material for: High-resolution epitope mapping by AllerScan reveals relationships between IgE and IgG repertoires during peanut oral immunotherapy
Source: PubMed Central journal article supplement (PMC8563412; doi:10.1016/j.xcrm.2021.100410), 2021-10-19
Supplement: mmc1.pdf [file mmc1.pdf]

**Cell Reports Medicine, Volume 2**

**Supplemental information**

**High-resolution epitope mapping by AllerScan  
reveals relationships between IgE and IgG  
repertoires during peanut oral immunotherapy**

**Genghao Chen, Ellen L. Shrock, Mamie Z. Li, Jonathan M. Spergel, Kari C. Nadeau, Jacqueline A. Pongracic, Dale T. Umetsu, Rima Rachid, Andrew J. MacGinnitie, Wanda Phipatanakul, Lynda Schneider, Hans C. Oettgen, and Stephen J. Elledge**

Supplementary Figures  
Supp. Figure 1

A

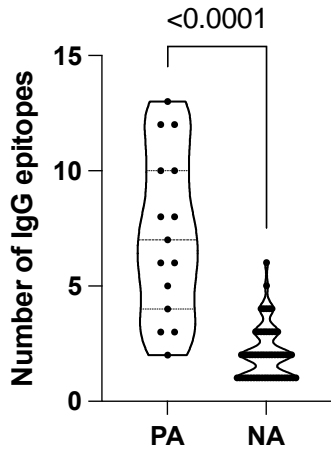

B

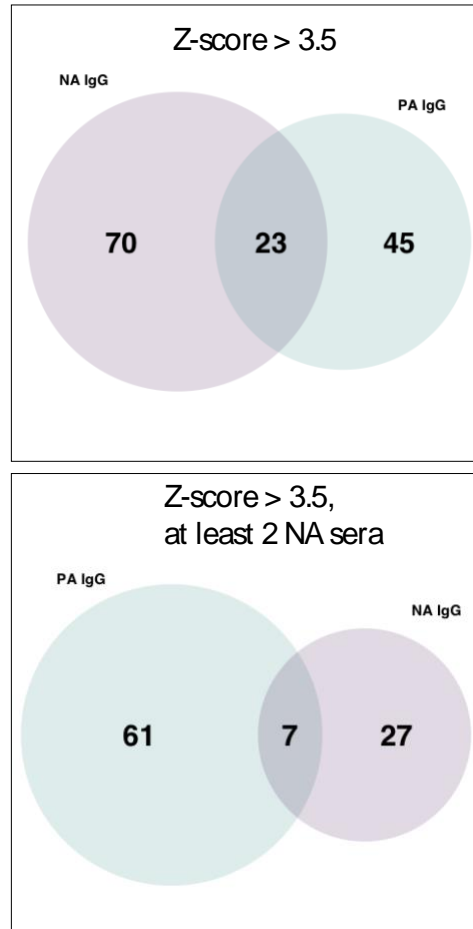

C

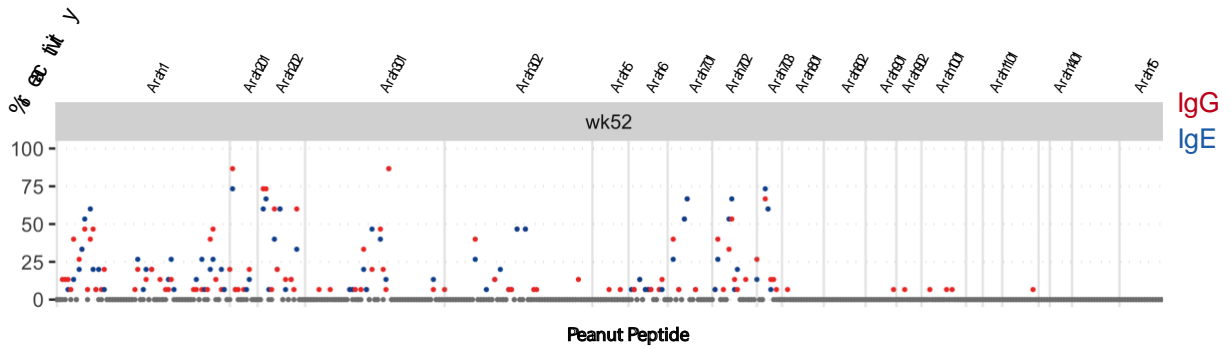

**Figure S1. Quantification of IgG epitopes recognized by peanut-allergic vs non-allergic individuals. Related to Figure 1.** (A) Number of IgG epitopes recognized by peanut-allergic (PA) OIT patients (week 0 sera) and non-allergic (NA) sera. P-value =  $5.1e-6$ , Student's t test. (B) Overlap between PA and NA epitopes with Z-scores  $> 3.5$  (top) or Z-scores  $> 3.5$  in at least 2 NA sera (bottom). (C) Seroprevalence of antibodies to peanut epitopes in week 52 (after OIT). Percentage of allergic patients exhibiting IgE (blue) and IgG (red) reactivity to peptides in the peanut AllerScan library.

**Supp. Figure 2**

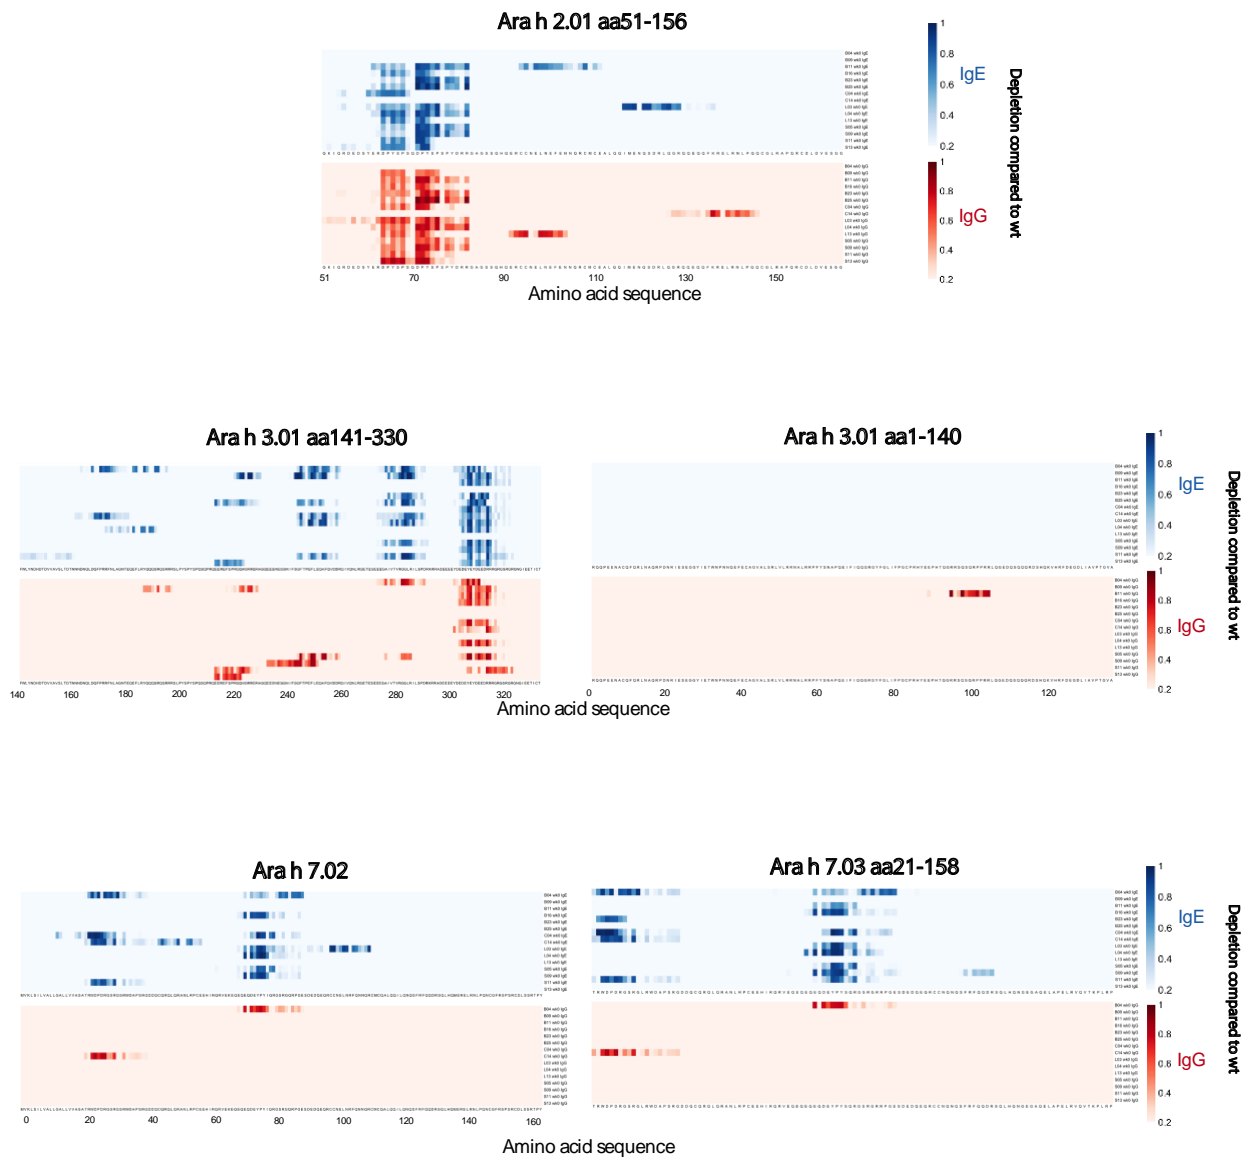

**Figure S2. Critical residues of IgE and IgG epitopes (OIT week 0 sera). Related to Figure 2.** Heatmaps as in Figure 2 show detailed mapping of IgE and IgG epitopes in OIT patients at week 0.

Supp. Figure 3

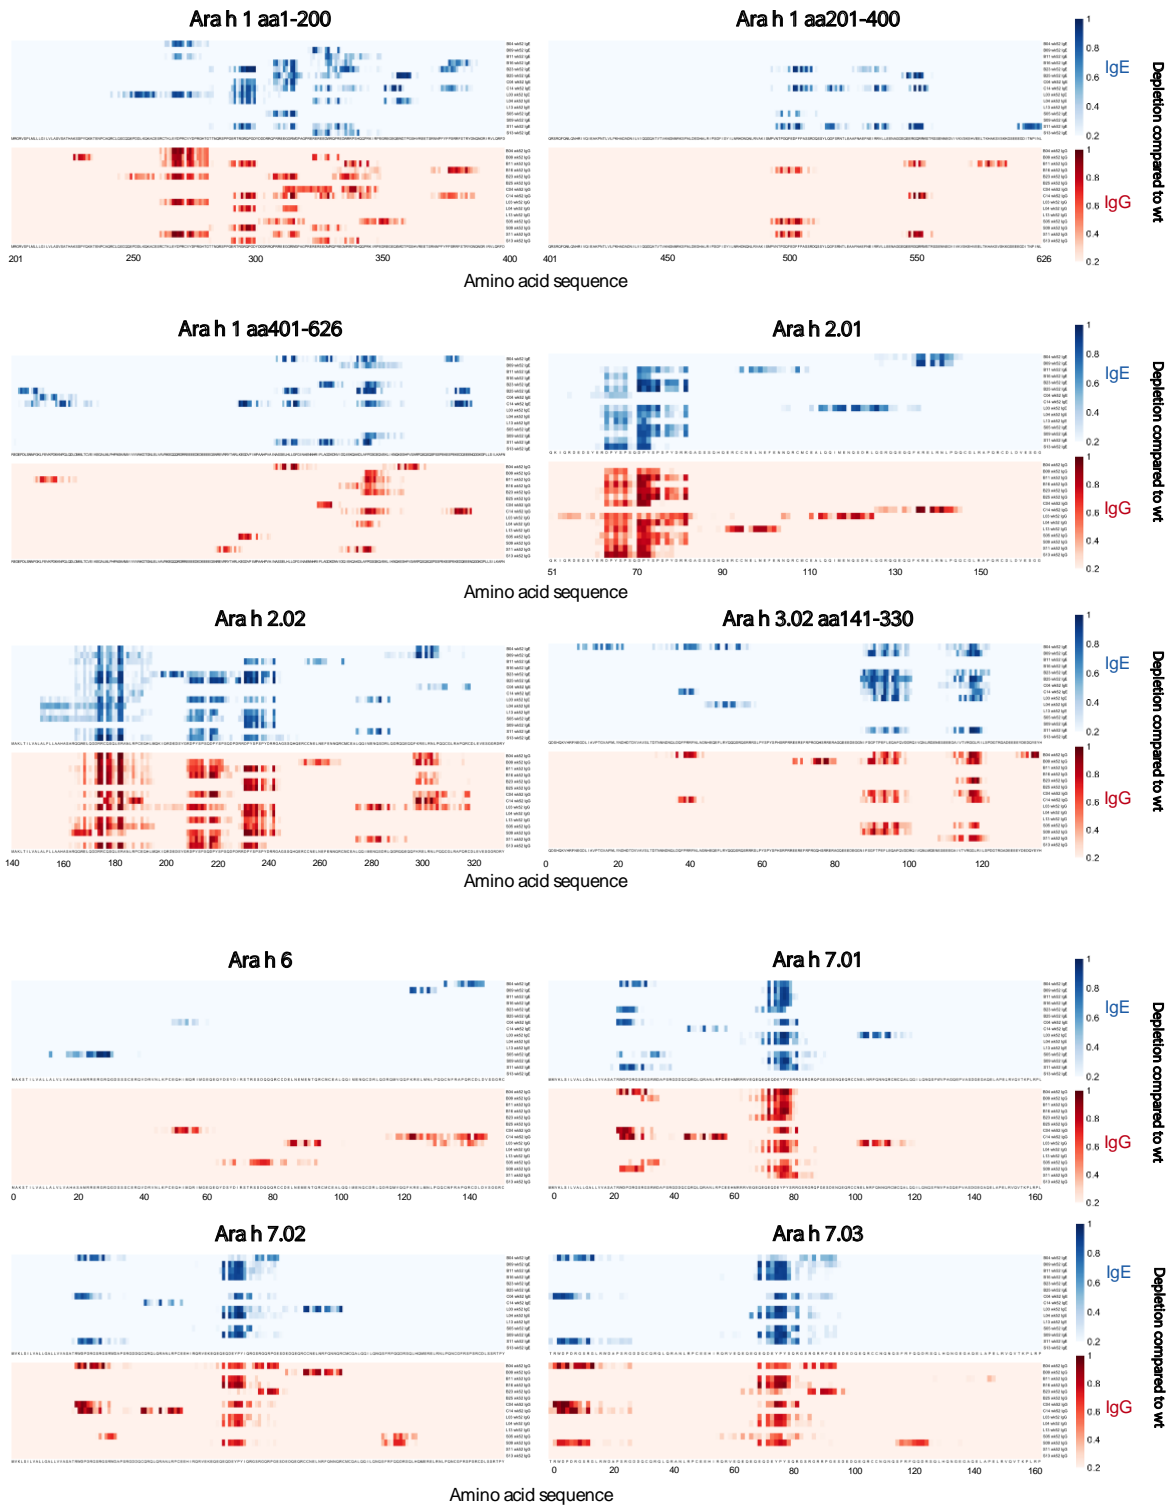

**Figure S3. Critical residues of IgE and IgG epitopes (OIT week 52 sera). Related to Figure 2.** Heatmaps as in Figure 2 show detailed mapping of IgE and IgG epitopes in OIT patients at week 52.

Supp. Figure 4

A

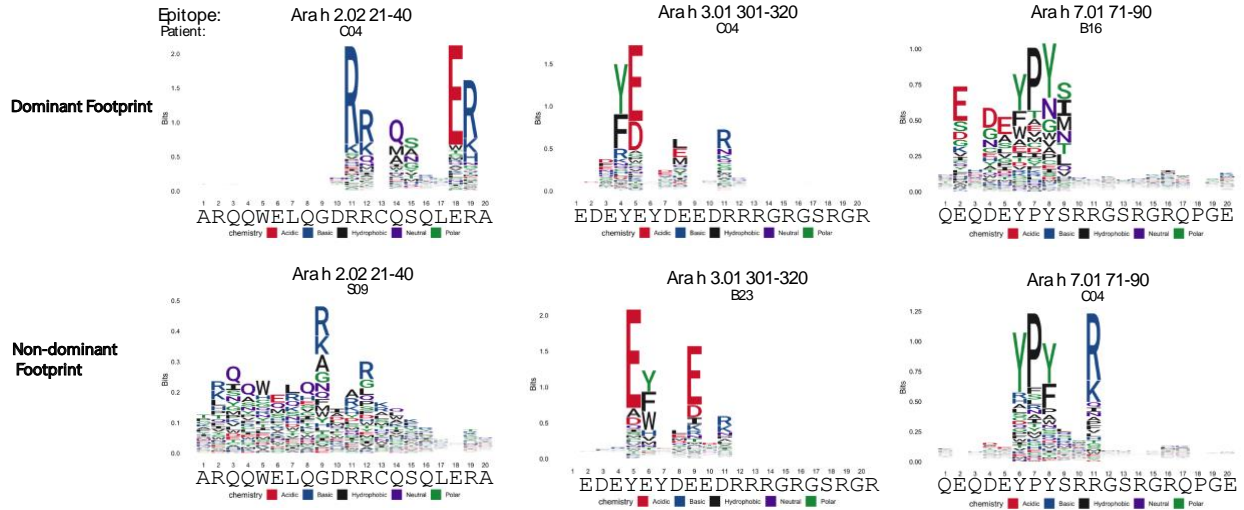

B

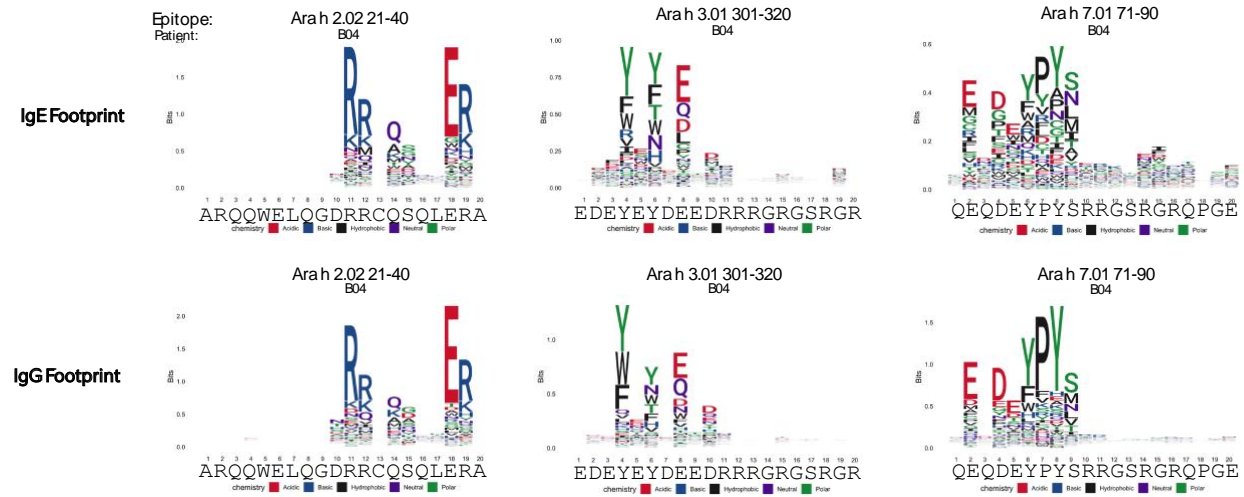

**Figure S4. Sequence logo plots illustrate permissibility of amino acid substitutions in public epitopes and similarity between one individual's IgE and IgG footprints. Related to Figure 3.** Each logo plot shows the permissible amino acids at the indicated positions of a peanut public epitope for one allergic patient. (A) Dominant (top) footprints and non-dominant (bottom) footprints of IgE epitopes obtained from pre-OIT sera. (B) IgE (top) and IgG (bottom) antibody footprints from one allergic patient, B04, for three public epitopes are depicted. IgE footprints were generated from week 0 sera and IgG footprints were generated from week 52 sera. To generate sequence logo plots, relative-to-wild-type enrichment matrices were used as inputs to the ggseqlogo R package <sup>22</sup>.

Supp. Figure 5

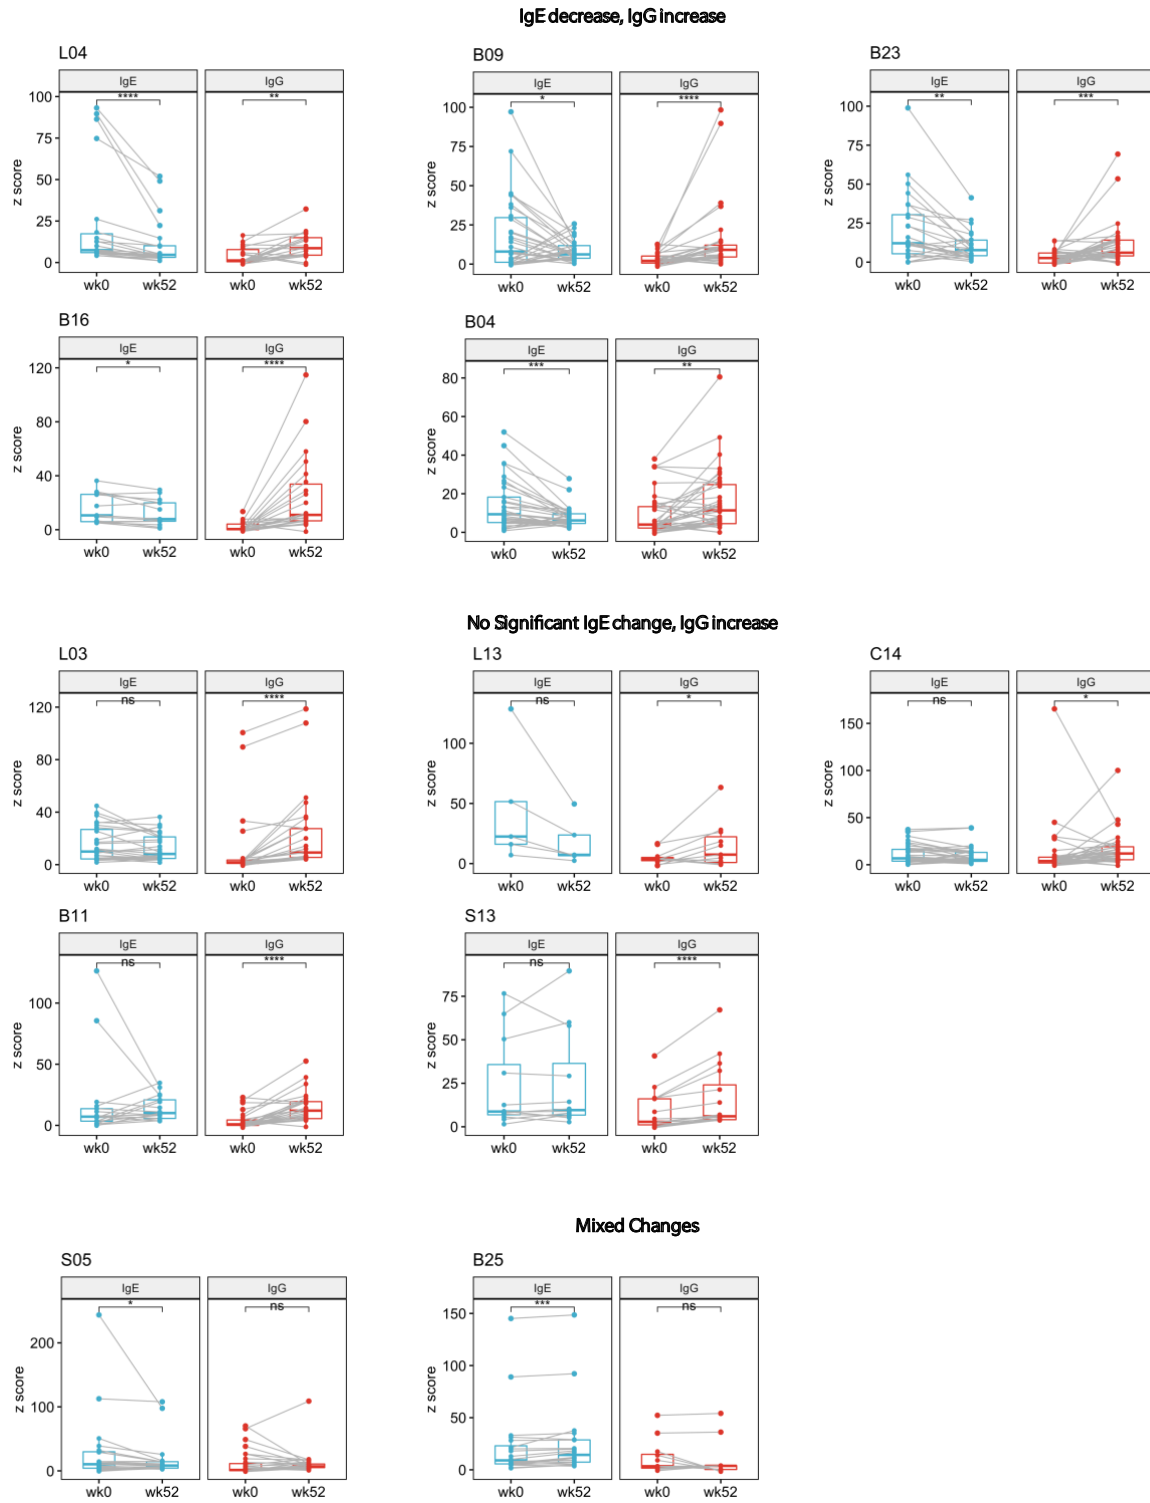

**Figure S5. OIT-induced changes in peptide-specific IgE and IgG reactivity. Related to Figure 4 and 5.** Change in peptide binding Z-score, from week 0 to week 52 in allergic patients. Only peptides with week 0 or week 52 reactivity (Z-score >3.5) were examined. Each dot represents one peptide. Top, patients exhibiting overall reduction in IgE and increase in IgG reactivity to peanut peptides; middle, patients with no change in IgE and increase in IgG; bottom, patients with mixed changes in IgE and IgG binding. Statistical significance was determined by Wilcoxon signed rank test.

**Supp. Figure 6**

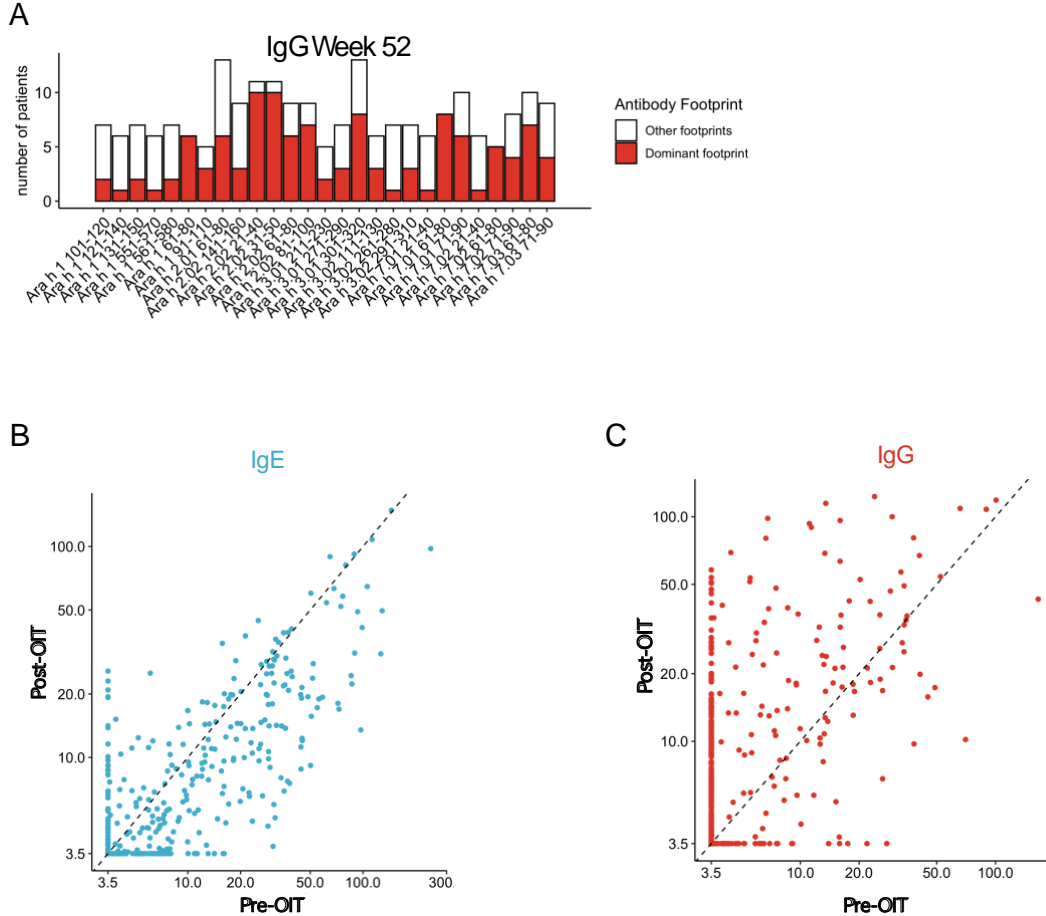

**Figure S6. Similarity of IgG footprints among post-OIT sera and scatterplots comparing pre-OIT and post-OIT peptide binding by IgE and IgG. Related to Figure 3, 4 and 5.** (A) Number of patients who share the dominant IgG antibody footprint for each of the public epitopes indicated by the x-axis after OIT (week 52). Red, dominant footprint; white, other footprints. (B, C) Scatterplots comparing pre-OIT and post-OIT Z-scores, a surrogate measure of peptide-specific antibody titer, of (B) IgE and (C) IgG epitopes. Each dot represents one peptide. Peptides with Z-score < 3.5 were collapsed to Z = 3.5. Diagonal line represents unchanged Z-scores.

**Supplementary Table Legends**

**Table S6. Patient clinical information. Related to STAR Methods.**

| <b>Patient ID</b> | <b>Sample group</b> | <b>Age</b> | <b>Gender</b> | <b>Baseline Total IgE (kUa/L)</b> | <b>Baseline peanut-specific IgE (kUa/L)</b> |
|-------------------|---------------------|------------|---------------|-----------------------------------|---------------------------------------------|
| L13               | OIT                 | 7          | F             | 224                               | 27.0                                        |
| B04               | OIT                 | 15         | M             | 478                               | 147.0                                       |
| B09               | OIT                 | 9          | M             | 493                               | 162.0                                       |
| B11               | OIT                 | 11         | M             | 282                               | 90.6                                        |
| B16               | OIT                 | 14         | F             | 1055                              | 54.0                                        |
| C04               | OIT                 | 7          | M             | 125                               | 26.1                                        |
| L04               | OIT                 | 10         | M             | 177                               | 41.8                                        |
| S05               | OIT                 | 10         | M             | 858                               | 296.0                                       |
| S09               | OIT                 | 9          | M             | 798                               | 251.0                                       |
| S13               | OIT                 | 7          | M             | 661                               | 483.0                                       |
| B25               | OIT                 | 19         | F             | 997                               | 263.0                                       |
| L03               | OIT                 | 11         | F             | 953                               | 360.0                                       |
| S11               | OIT                 | 8          | F             | 207                               | 61.1                                        |
| B23               | OIT                 | 9          | F             | 918                               | 535.0                                       |
| C14               | OIT                 | 15         | F             | 491                               | 273.0                                       |
| <b>OIT MEAN</b>   | OIT                 | 10.7       | N/A           | 581.1                             | 204.7                                       |
| <b>OIT SD</b>     | OIT                 | 3.5        | N/A           | 331.0                             | 164.9                                       |
| EASY-9018         | non-allergic        | 9          | F             | 224                               | <0.35                                       |
| EASY-9027         | non-allergic        | 9          | M             | 478                               | <0.35                                       |
| EASY-9038         | non-allergic        | 9          | F             | 493                               | <0.35                                       |
| EASY-9058         | non-allergic        | 8          | M             | 282                               | <0.35                                       |
| <b>EASY MEAN</b>  | non-allergic        | 8.8        | N/A           | 369.3                             | <0.35                                       |
| <b>EASY SD</b>    | non-allergic        | 0.5        | N/A           | 136.4                             | N/D                                         |

We do not have information on the remaining non-allergic healthy donors.
